# Supplementary material
Source: Royal Society of Chemistry journal article supplement (doi:10.1039/d5nj04579g)
Supplement: d5nj04579g1.pdf [file d5nj04579g1.pdf]

## Supplementary Information

Xin-Ru Zhu,<sup>a</sup> Ze Li,<sup>b</sup> Dan Sun,<sup>c</sup> Roudaina Elmidaoui,<sup>a</sup> Meng-Xuan Dai,<sup>a</sup> Zhi-Long Zhao,<sup>a</sup> Xiang-Zhu Chen,<sup>a,d\*</sup> Fei Jiang,<sup>a,d\*</sup> Lu Liu<sup>a,d\*</sup>

<sup>a</sup> *College of Pharmacy, Linyi University, Linyi, Shandong 276000, China*

<sup>b</sup> *College of Ecological and Environmental Protection, Linyi Vocational University of Science and Technology, Linyi, Shandong 276000, China*

<sup>c</sup> *Rizhao Science and Technology Innovation Service Center, 276800, China*

<sup>d</sup> *Shandong Provincial Key Laboratory of Biological Preparation and Application Technology for Functional Glycomics.*

\*Corresponding authors

## Contents

| Description                                                                                                                          | Page No. |
|--------------------------------------------------------------------------------------------------------------------------------------|----------|
| <b>Figure S1</b> DSC (blue line) and TG (red line) profiles of PCI-FA.                                                               | 3        |
| <b>Figure S2</b> DSC (blue line) and TG (red line) profiles of PCI-VA.                                                               | 3        |
| <b>Figure S3</b> DSC (blue line) and TG (red line) profiles of PCI-SA.                                                               | 4        |
| <b>Table S1.</b> Average Hygroscopicity of PCI, PCI-FA, PCI-SA, and PCI-VA at Different RH Conditions.                               | 4-5      |
| <b>Fig. S4</b> Solvent Negative Controls for <i>E. coli</i> , <i>S. aureus</i> and <i>B. subtilis</i> .                              | 5        |
| <b>Table S2.</b> Antibacterial Activity of PCI-FA, PCI-VA, PCI-SA Cocrystals and their Physical Mixtures against <i>E.coli</i> .     | 6        |
| <b>Fig. S5</b> Oxford Cup Test Results of PCI-FA, PCI-VA, PCI-SA Cocrystals and their Physical Mixtures on <i>E. coli</i> .          | 6        |
| <b>Table S3.</b> Antibacterial Activity of PCI-FA, PCI-VA, PCI-SA Cocrystals and their Physical Mixtures against <i>S.aureus</i> .   | 7        |
| <b>Fig. S6</b> Oxford Cup Test Results of PCI-FA, PCI-VA, PCI-SA Cocrystals and their Physical Mixtures on <i>S.aureus</i> .         | 7        |
| <b>Table S4.</b> Antibacterial Activity of PCI-FA, PCI-VA, PCI-SA Cocrystals and their Physical Mixtures against <i>B.subtilis</i> . | 8        |
| <b>Fig. S7</b> Oxford Cup Test Results of PCI-FA, PCI-VA, PCI-SA Cocrystals and their Physical Mixtures on <i>B.subtilis</i> .       | 8        |

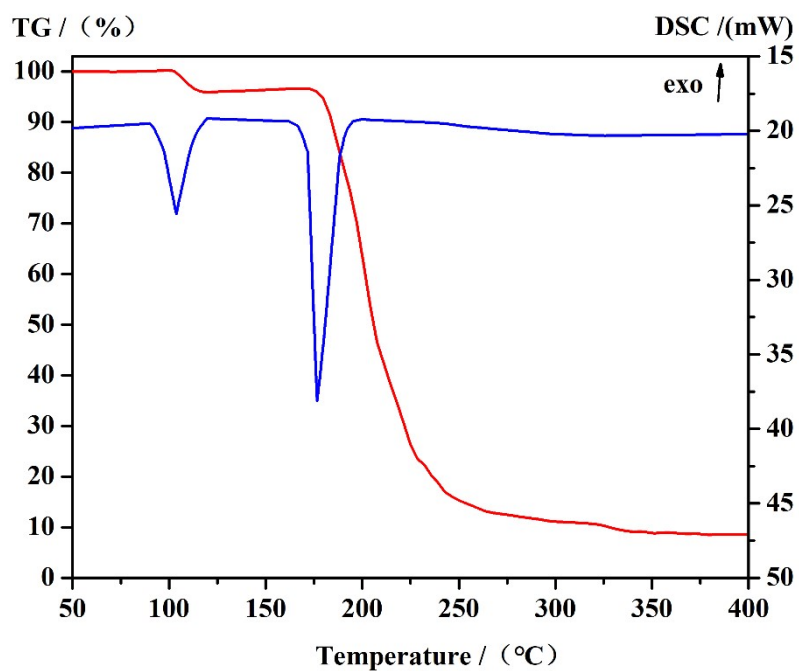

Figure S1 DSC (blue line) and TG (red line) profiles of PCI-FA.

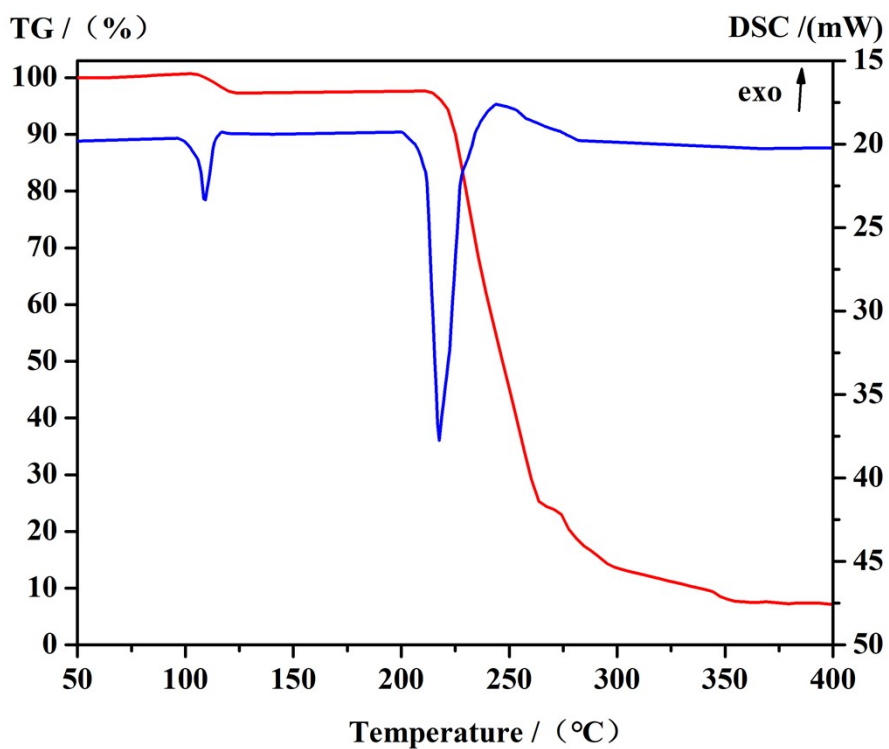

Figure S2 DSC (blue line) and TG (red line) profiles of PCI-VA.

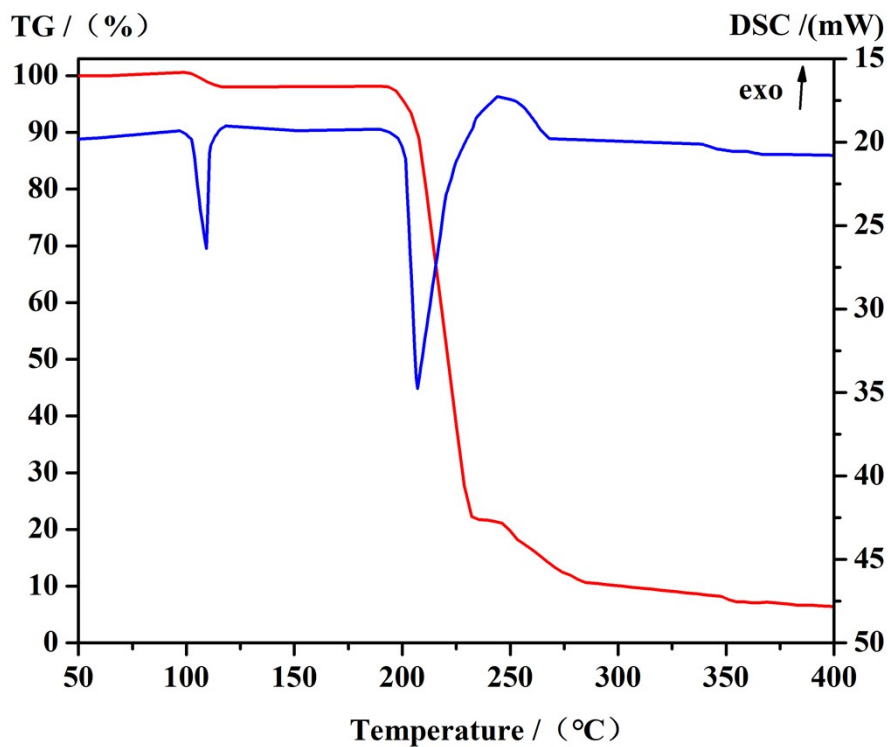

**Figure S3** DSC (blue line) and TG (red line) profiles of PCI-SA.

| Sample | RH Condition | Replicate | Initial Mass (mg) | Final Mass (mg) | Moisture Uptake (%) | Average Hygroscopicity (%) |
|--------|--------------|-----------|-------------------|-----------------|---------------------|----------------------------|
| PCI    | 75% RH       | 1         | 50.02             | 53.59           | 7.13                | -                          |
|        |              | 2         | 50.15             | 53.72           | 7.12                | -                          |
|        |              | 3         | 49.98             | 53.58           | 7.14                | 7.13                       |
|        | 80% RH       | 1         | 50.01             | 58.97           | 17.92               | -                          |
|        |              | 2         | 50.1              | 58.98           | 17.92               | -                          |
|        |              | 3         | 49.95             | 58.96           | 17.93               | 17.92                      |
|        | 98% RH       | 1         | 50.02             | 59.94           | 19.92               | -                          |
|        |              | 2         | 50.15             | 59.95           | 19.92               | -                          |
|        |              | 3         | 49.98             | 59.93           | 19.94               | 19.93                      |
| PCI-FA | 75% RH       | 1         | 50.05             | 51.4            | 2.81                | -                          |
|        |              | 2         | 50.1              | 51.41           | 2.81                | -                          |
|        |              | 3         | 49.95             | 51.39           | 2.82                | 2.81                       |
|        | 80% RH       | 1         | 50.03             | 51.81           | 3.61                | -                          |
|        |              | 2         | 50.08             | 51.82           | 3.61                | -                          |
|        |              | 3         | 49.95             | 51.8            | 3.62                | 3.61                       |
|        | 98% RH       | 1         | 50.05             | 52.07           | 4.15                | -                          |
|        |              | 2         | 50.1              | 52.08           | 4.15                | -                          |

**Table S1.** Average Hygroscopicity of PCI, PCI-FA, PCI-SA, and PCI-VA at Different RH Conditions.

| Sample | RH Condition | Replicate | Initial Mass (mg) | Final Mass (mg) | Moisture Uptake (%) | Average Hygroscopicity (%) |
|--------|--------------|-----------|-------------------|-----------------|---------------------|----------------------------|
| PCI-SA | 75% RH       | 3         | 49.95             | 52.06           | 4.16                | 4.15                       |
|        |              | 1         | 50.08             | 51.89           | 3.79                | -                          |
|        |              | 2         | 50.12             | 51.9            | 3.79                | -                          |
|        | 80% RH       | 3         | 49.92             | 51.88           | 3.8                 | 3.79                       |
|        |              | 1         | 50.05             | 52.19           | 4.38                | -                          |
|        |              | 2         | 50.1              | 52.2            | 4.38                | -                          |
|        | 98% RH       | 3         | 49.92             | 52.18           | 4.39                | 4.38                       |
|        |              | 1         | 50.08             | 52.64           | 5.25                | -                          |
|        |              | 2         | 50.12             | 52.65           | 5.25                | -                          |
| PCI-VA | 75% RH       | 3         | 49.92             | 52.63           | 5.26                | 5.25                       |
|        |              | 1         | 50                | 52.19           | 4.39                | -                          |
|        |              | 2         | 50.05             | 52.2            | 4.39                | -                          |
|        | 80% RH       | 3         | 49.9              | 52.18           | 4.4                 | 4.39                       |
|        |              | 1         | 50                | 52.7            | 5.41                | -                          |
|        |              | 2         | 50.05             | 52.71           | 5.41                | -                          |
|        | 98% RH       | 3         | 49.9              | 52.69           | 5.42                | 5.41                       |
|        |              | 1         | 50                | 53.28           | 6.57                | -                          |
|        |              | 2         | 50.05             | 53.29           | 6.57                | -                          |
|        |              | 3         | 49.9              | 53.27           | 6.58                | 6.57                       |

**Continued Table S1.** Average Hygroscopicity of PCI, PCI-FA, PCI-SA, and PCI-VA at Different RH Conditions.

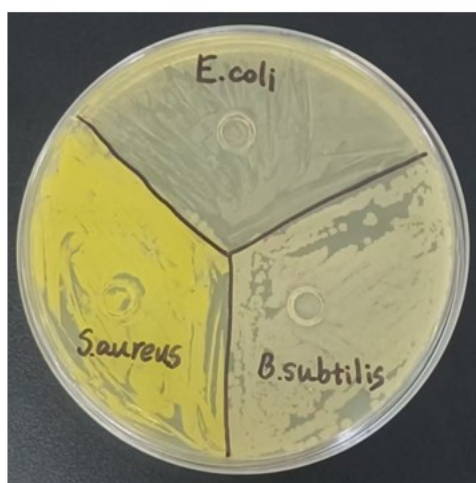

**Fig. S4** Solvent Negative Controls for *E. coli*, *S. aureus* and *B. subtilis*.

**Table S2.** Antibacterial Activity of PCI-FA, PCI-VA, PCI-SA Cocrystals and their Physical Mixtures against *E.coli*.

| Bacterial strain           | Diameter of inhibition zone (mm) |          |          |          |
|----------------------------|----------------------------------|----------|----------|----------|
|                            | <i>E.coli</i>                    |          |          |          |
| Drug concentration (mg/mL) | 5                                | 2.5      | 1.25     | 0.63     |
| Number on desk             | 1                                | 2        | 3        | 4        |
| PM1                        | 16.1±0.1                         | 13.0±0.1 | 9.3±0.2  | 8.0±0.2  |
| PM2                        | 16.0±0.1                         | 15.7±0.1 | 9.0±0.1  | 8.0±0.2  |
| PM3                        | 15.0±0.1                         | 12.9±0.1 | 8.3±0.2  | 7.5±0.2  |
| PCI-FA                     | 24.5±0.1                         | 22.3±0.2 | 20.0±0.1 | 18.3±0.2 |
| PCI-VA                     | 22.9±0.2                         | 22.0±0.1 | 19.0±0.1 | 17.0±0.1 |
| PCI-SA                     | 21.1±0.2                         | 20.0±0.1 | 17.5±0.1 | 15.1±0.2 |

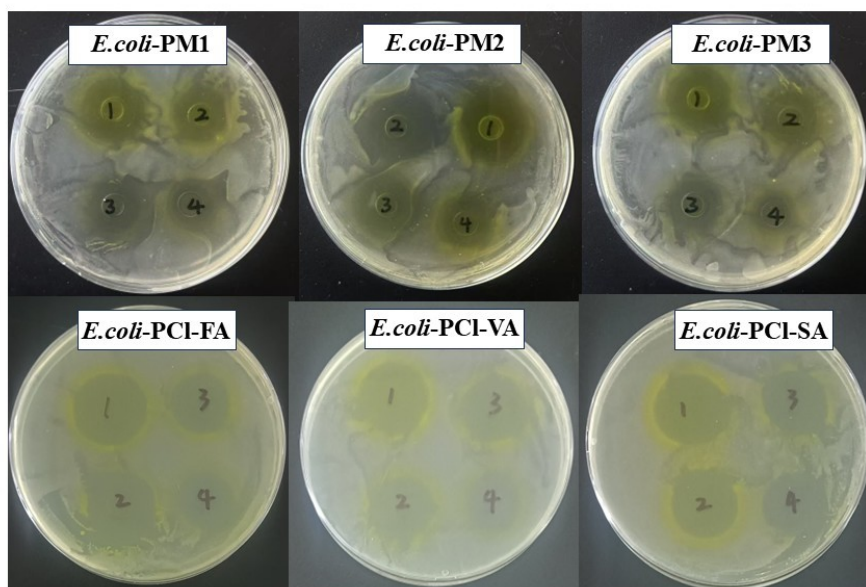

**Fig. S5** Oxford Cup Test Results of PCI-FA, PCI-VA, PCI-SA Cocrystals and their Physical Mixtures on *E. coli*.

**Table S3.** Antibacterial Activity of PCI-FA, PCI-VA, PCI-SA Cocrystals and their Physical

Mixtures against *S.aureus*.

|                            |                 | Diameter of inhibition zone (mm) |          |          |  |
|----------------------------|-----------------|----------------------------------|----------|----------|--|
| Bacterial strain           | <i>S.aureus</i> |                                  |          |          |  |
| Drug concentration (mg/mL) | 5               | 2.5                              | 1.25     | 0.63     |  |
| Number on desk             | 1               | 2                                | 3        | 4        |  |
| PM1                        | 16.0±0.1        | 15.6±0.1                         | 14.0±0.2 | 9.0±0.2  |  |
| PM2                        | 16.0±0.1        | 15.7±0.1                         | 14.2±0.1 | 8.7±0.1  |  |
| PM3                        | 15.0±0.1        | 14.3±0.2                         | 14.0±0.1 | 8.3±0.1  |  |
| PCI-FA                     | 22.7±0.2        | 22.0±0.1                         | 17.7±0.2 | 12.7±0.1 |  |
| PCI-VA                     | 20.7±0.1        | 20.2±0.1                         | 18.2±0.2 | 12.0±0.2 |  |
| PCI-SA                     | 20.0±0.2        | 19.7±0.1                         | 15.3±0.1 | 11.7±0.2 |  |

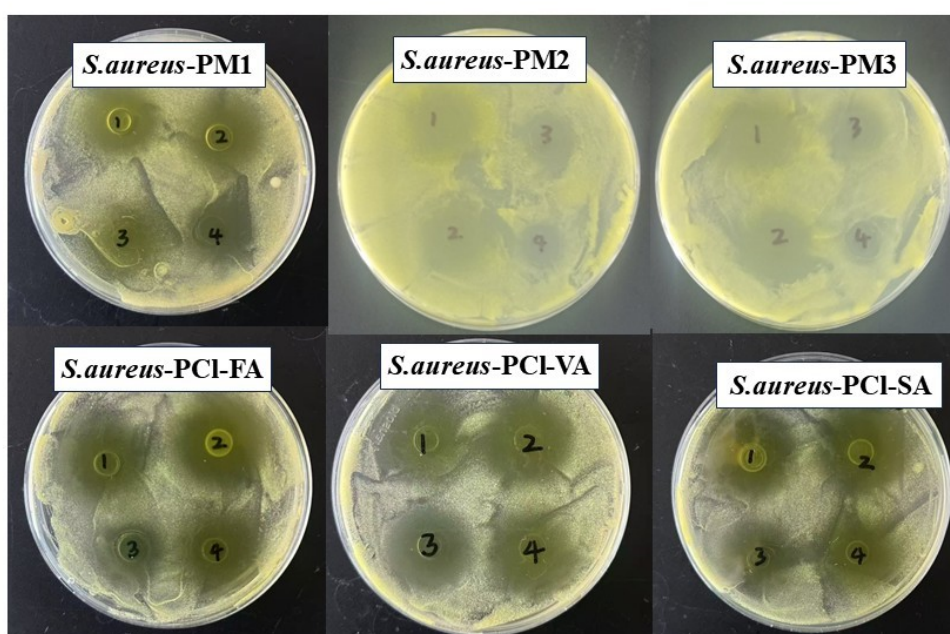

**Fig. S6** Oxford Cup Test Results of PCI-FA, PCI-VA, PCI-SA Cocrystals and their Physical Mixtures on *S.aureus*.

**Table S4.** Antibacterial Activity of PCI-FA, PCI-VA, PCI-SA Cocrystals and their Physical Mixtures against *B.subtilis*.

| Bacterial strain           | Diameter of inhibition zone (mm) |          |          |          |
|----------------------------|----------------------------------|----------|----------|----------|
|                            | <i>B.subtilis</i>                |          |          |          |
| Drug concentration (mg/mL) | 5                                | 2.5      | 1.25     | 0.63     |
| Number on desk             | 1                                | 2        | 3        | 4        |
| PM1                        | 16.0±0.1                         | 13.0±0.1 | 12.0±0.2 | 9.3±0.2  |
| PM2                        | 15.8±0.2                         | 12.7±0.2 | 11.0±0.1 | 9.0±0.1  |
| PM3                        | 11.5±0.1                         | 10.6±0.1 | 10.1±0.1 | 7.9±0.2  |
| PCI-FA                     | 24.5±0.2                         | 23.7±0.1 | 21.0±0.1 | 17.8±0.1 |
| PCI-VA                     | 22.0±0.1                         | 20.0±0.1 | 19.0±0.2 | 17.0±0.2 |
| PCI-SA                     | 20.0±0.2                         | 16.1±0.1 | 15.5±0.1 | 15.0±0.1 |

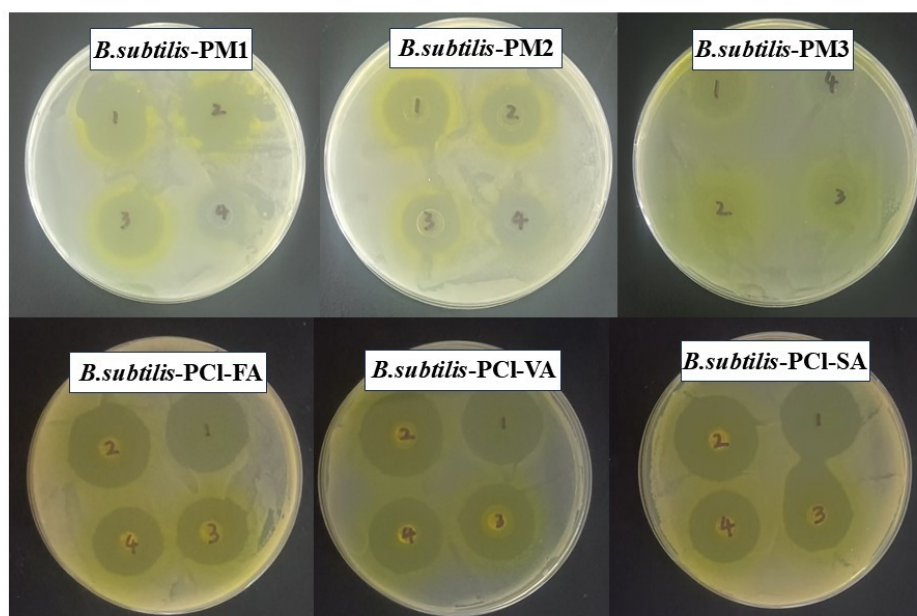

**Fig. S7** Oxford Cup Test Results of PCI-FA, PCI-VA, PCI-SA Cocrystals and their Physical Mixtures on *B.subtilis*.
